# Supplementary material for: A Circularly Polarized Light Phototransistor Detector with Large Anisotropy Factor and Giant Gains
Source: Research Square preprint supplement (doi:10.21203/rs.3.rs-3110699/v1), 2023-07-13
Supplement: Supplementary file 1 [file 57bbd62df176acc9a73d433a.docx]

**Supplementary information**

**This Supplementary Information includes:**

**Supplementary Fig. 1|** **Characterization of PTD devices.**

**Supplementary Fig. 2|** **Hall effect in van der Pauw geometries for ZrGeTe4 and MoS2.**

**Supplementary Fig. 3|** **The four-point collinear probe method.**

**Supplementary Fig. 4|** **The electrical characteristics of MoS2/ZrGeTe4/MoS2 PTD device in common-base configuration.**

**Supplementary Fig. 5|** **Noise spectrum density of the PTD devices.**

**Supplementary Fig. 6|** **Rise time (*τ*rise) and decay time (*τ*dacay) of the individual ZrGeTe4 photodetector at 633 nm.**

**Supplementary Note I. Fabrication MoS2/ZrGeTe4/MoS2 PTD**

**Supplementary Note Ⅱ. Angle Resolved Polarization Raman**

**Supplementary Note Ⅲ. Theoretical analysis of the circular photogalvanic effect**

**Hall Effect Measurement**

**Supplementary Note Ⅳ. Hall Effect Measurement**

**Supplementary Note Ⅴ. The Common-Base Configuration Measurement**

**Supplementary Note Ⅵ. Noise Spectral Density**

**Supplementary Note Ⅶ. Response Time of D2**

**Supplementary** **Table 1 Character table for C2v point group**

**Supplementary Table 2 Character table for CS point group**

**Supplementary References**

**Supplementary Note I. Fabrication MoS2/ZrGeTe4/MoS2 PTD**

MoS2, ZrGeTe4, BN, and MoS2 are stripped onto PDMS by mechanical exfoliation method and transferred to Si/SiO2 substrate in turn. Special attention should be taken when transferring BN, avoid widening the base width to make the device become a lateral PTD, which will lead to the reduction of current gain. The 45 nm-Au/5 nm-Cr was vapor deposited on the device by means of photolithography, and the device was annealed at 200°C for 30 min to improve the contact between the electrodes and the device. The optical micrographs of the devices are shown in **Supplementary Fig. 1**a: the width of the base region is about 1 μm. Atomic force microscopy (AFM) contact scans were performed on the emitter and collector, respectively. The MoS2 thicknesses of the emitter and collector are 1.3 μm and 11 μm, respectively, as shown in Supplementary Fig. 1b and c. High-quality ZrGeTe4 grown by the CVT method is used as the base, the width of which is about 10 μm. Raman spectra of ZrGeTe4, MoS2 and ZrGeTe4/MoS2 are shown in Supplementary Fig1. d.1

**Supplementary Fig. 1|** **Characterization of PTD devices.** a) Optical microscopy image of the device. b, c) AFM images of the MoS2 as collector and emitter. d) Raman spectra of ZrGeTe4, MoS2, and ZrGeTe4/MoS2 from top to bottom.

**Supplementary Note Ⅱ. Angle Resolved Polarization Raman**

The Raman tensors corresponding to the irreducible representations A1,2, and B1,2 are as follows:2

Each element of the Raman tensor matrix can be written in the following form:

Where *ψp* is the phase of the element of Raman tensor.

In parallel configuration, *ei* and *es* have the form:, and *es* is in the form of in cross configuration. Therefore, the intensities of Raman modes vary with polarization angle as follows:

**Supplementary Note Ⅲ. Theoretical analysis of the circular photogalvanic effect**

The ZrGeTe4 crystal belongs to the C2v point group, as shown in **Supplementary** **Table 1**, the pseudo-vector in the vertical direction (*z*-axis) cannot be coupled with the in-plane vector, i.e., the vertically incident polarized circular light cannot induce ICIR; however, due to the asymmetric lithography and crystal stacking, its symmetry is reduced to the Cs point group3, as shown in **Supplementary Table 2**, the pseudo-vector in the z-axis can be coupled with the vector in the *x* or *y* direction, i.e., the vertically incident circularly polarized light can induce *ICIR*.

**Supplementary** **Table 1 Character table for C2v point group**

| C2v | E | C2 | σv (xz) | σꞌv(yz) |  |
| --- | --- | --- | --- | --- | --- |
| A1 | 1 | 1 | 1 | 1 | z |
| A2 | 1 | 1 | -1 | -1 | Rz |
| B1 | 1 | -1 | 1 | -1 | x, Ry |
| B2 | 1 | -1 | -1 | 1 | y, Rx |

Where A1,2 and B1,2 are symmetry representation labels, and E, C2, and σv are symmetry operations, x, y, z, and Rx,y,z indicate vectors and pseudo-vectors.

**Supplementary Table 2 Character table for CS point group**

| Cs | E | σh |  |
| --- | --- | --- | --- |
| Aꞌ | 1 | 1 | x, y, Rz |
| Aꞌꞌ | 1 | -1 | z, Rx, Ry |

**Supplementary Note Ⅳ. Hall Effect Measurement**

The experiments for the Hall effect in van der Pauw geometries for ZrGeTe4 and MoS2, respectively,4 are shown in **Supplementary Fig. 2**. The carrier concentration and type of the semiconductor are obtained by changing the direction and intensity of the magnetic field by varying the voltage of the electromagnet. The carrier concentrations of MoS2 (n-type) with a thickness of 5.5 nm and ZrGeTe4 (p-type) with a thickness of 500 nm at room temperature are 2.32 × 1022 cm-3 and 1.55 × 1020 cm-3, respectively, as obtained from Equation 10 and 11:

where *RHall* and *VHall* are the Hall coefficient and the measured voltage between the two opposite electrodes, respectively, *d* is the thickness of the crystal, *B* and *I* are the magnetic induction and current strength applied to the crystal, respectively, *q* is the fundamental charge, and p and n are the hole and electron concentrations in the material, respectively.

**Supplementary Fig. 2|** **Hall effect in van der Pauw geometries for ZrGeTe4 and MoS2.** a) Optical microphoto of MoS2. b) AFM image of MoS2. c) Measuring Hall voltage (*VHall*) of MoS2. d) optical microphoto of ZrGeTe4. e) AFM image of ZrGeTe4. f) Measuring *VHall* of ZrGeTe4.

**Supplementary Fig. 3**a illustrates the electrical conductivity of ZrGeTe4 nanowire by the four-point collinear probe method;5 electrodes 1 and 4 are loaded with a current source, and electrodes 2 and 3 are examined for voltage drop. Supplementary Fig. 3b exhibits the morphology of a ZrGeTe4 sample scanned by AFM, with nanowires measuring 1.0 μm in width and 47.6 nm in thickness, and the variation of *V*23 with *I*14. The sample of ZrGeTe4 nanowire has a 6.75×10-2 Ω·cm electrical resistivity at room temperature from Equation 12:

where *d* is the thickness of the crystal.

**Supplementary Fig. 3|** **The four-point collinear probe method.** a) Optical microscopy image of the device. b) AFM image of ZrGeTe4 nanowire. c) *V*23 as a function of *I*14.

**Supplementary Note Ⅴ. The Common-Base Configuration Measurement**

The circuit connection and electron transport schematic are portrayed in **Supplementary Fig. 4**a. Supplementary Fig. 4b displays the variation of the emitter current (*I*E) with *V*BE at different *V*CB, i.e., series of input characteristic curves of the device, with an increasing trend of the input current *I*E as *V*CB and *V*BE increase.6 The output characteristics are depicted in Supplementary Fig. 4c, which shows the increase of collector current (*I*C) with increasing *V*CB at four different *V*BE from 0.4 to 1.6 V in steps of 0.4 V. Supplementary Fig. 4d displays the simultaneous variation of *I*C and *I*E with the *V*BE for a fixed *V*CB. When *V*CB = 4 V, both *I*C and *I*E increase exponentially with the linear increase of *V*BE, and the growth rate of *I*E is faster than *I*C. As shown in Supplementary Fig. 4e, the ratio between *I*C and *I*E (*α* = *I*C/*I*E, current gain) decreases (increases) with increasing *V*BE (*V*CB) in the configuration of common base, and *α*=0.95 at *V*BE = 1.0 V, *V*CB = 4.0 V.

**Supplementary Fig. 4|** **The electrical characteristics of MoS2/ZrGeTe4/MoS2 PTD device in common-base configuration.** a) Optical microscope image of the device. b) Carrier transport and electrical connection schematic illustration of the device. c) Input characteristics of the device in common-base, emitter current (*I*E) as a function of the base-emitter voltage (*V*BE) at various collector-base (*V*CB) voltages. d) Output characteristics, collector current (*I*C) as a function of *V*CB at various *V*BE. e) *I*E and *I*C as a function of *V*BE at *V*CB = 4 V. f) *I*E/*I*C (*α*) as a function of *V*BE at various *V*CB.

**Supplementary Note Ⅵ. Noise Spectral Density**

Noise in electronic devices is generally composed of 1/*f* noise and shot noise. In the low frequency region, 1/*f* noise produces a dominant role, noise with the increase in frequency into a decreasing trend; when the frequency continues to increase to the high frequency region, shot noise plays a dominant role, the noise is a constant with the increase in frequency.7 The statistical relationship between noise and frequency can be expressed by the following equation:

where Amp is the contribution of white noise, and B is the amplitude of 1/*f* noise. The noise in the low frequency range of the PTD device in this work is shown in **Supplementary Fig. 5**. The noise tends to decrease as the frequency increases, and the black dashed line in the figure is used to indicate the noise trend. Another parameter used to measure the performance of the device, the noise equivalent power (NEP), can be determined from the noise spectral density. NEP defined as the signal power corresponding to a signal-to-noise ratio equal to one in a 1 Hz output bandwidth, NEP =*in*/*R*, where *in* represents current noise and *R* expresses responsivity.

**Supplementary Fig. 5|** **Noise spectrum density of the PTD devices.** The black dash line is the trend of noise.

**Supplementary Note Ⅶ. Response Time of D2**

**Supplementary Fig. 6|** **Rise time (*τ*rise) and decay time (*****τ*dacay) of the individual ZrGeTe4 photodetector at 633 nm.** *τ*rise = 0.7 ms and *τ*dacay = 0.77 ms. The period of electro-optic modulator is 10 μs.

**Supplementary References**

1 Li, H. *et al.* From Bulk to Monolayer MoS2: Evolution of Raman Scattering. *Advanced Functional Materials* **22**, 1385-1390 (2012).

2 Shojaei, I. A. *et al.* A Raman probe of phonons and electron–phonon interactions in the Weyl semimetal NbIrTe4. *Sci. Rep.* **11**, 8155 (2021).

3 Quereda, J. *et al.* Symmetry regimes for circular photocurrents in monolayer MoSe2. *Nat. Commun.* **9**, 3346 (2018).

4 Bierwagen, O., Pomraenke, R., Eilers, S. & Masselink, W. T. Mobility and carrier density in materials with anisotropic conductivity revealed by van der Pauw measurements. *Physical Review B* **70**, 165307 (2004).

5 Boll, M. *et al.* Sensitivity analysis explains quasi-one-dimensional current transport in two-dimensional materials. *Physical Review B* **90**, 245432 (2014).

6 Sengupta, K., Nagatsuma, T. & Mittleman, D. M. Terahertz integrated electronic and hybrid electronic–photonic systems. *Nature Electronics* **1**, 622-635 (2018).

7 Balandin, A. A. Low-frequency 1/f noise in graphene devices. *Nature Nanotechnology* **8**, 549-555 (2013).
